# Supplementary material for: Alveolar regeneration through a Krt8+ transitional stem cell state that persists in human lung fibrosis
Source: PubMed Central journal article supplement (PMC7366678; doi:10.1038/s41467-020-17358-3), 2020-07-16
Supplement: 41467_2020_17358_MOESM3_ESM.pdf [file 41467_2020_17358_MOESM3_ESM.pdf]

## **Description of Additional Supplementary Files**

File Name: Supplementary Data 1  
Description: Cell type marker genes from whole lung dataset

File Name: Supplementary Data 2  
Description: Cell type resolved differential gene expression after bleomycin

File Name: Supplementary Data 3  
Description: Cell type marker genes from high resolution epithelial cell dataset

File Name: Supplementary Data 4  
Description: Cell state trajectory – convergence of airway and alveolar stem cells

File Name: Supplementary Data 5  
Description: Cell state trajectory – Krt8+ ADI to AT1

File Name: Supplementary Data 6  
Description: Receptor-ligand connectome
